# Supplementary material for: Solar Light Photoactive Floating Polyaniline/TiO2 Composites for Water Remediation
Source: MDPI journal article supplement (doi:10.3390/nano11113071), 2021-11-15
Supplement: s1 [file s1]

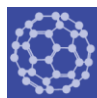

## Supporting Information

### Solar Light Photoactive Floating Polyaniline/TiO<sub>2</sub> Composites for Water Remediation

Ermelinda Falletta <sup>1,2,\*</sup>, Anna Bruni <sup>1</sup>, Marta Sartirana <sup>1</sup>, Daria C. Boffito <sup>3</sup>, Giuseppina Cerrato <sup>4</sup>, Alessia Giordana <sup>4</sup>, Ridha Djellabi <sup>1,2</sup>, Erfan S. Khatibi <sup>1</sup> and Claudia L. Bianchi <sup>1,2</sup>

<sup>1</sup> Department of Chemistry, Università degli Studi di Milano, via Golgi 19, 20133 Milano, Italy; anna.bruni@unimi.it (A.B.); marta.sartirana@unimi.it (M.S.); ridha.djellabi@unimi.it (R.D.); erfan.saberkhatibi@studenti.unimi.it (E.S.K.); claudia.bianchi@unimi.it (C.L.B.)

<sup>2</sup> Consorzio Interuniversitario Nazionale per la Scienza e Tecnologia dei Materiali (INSTM), via Giusti 9, 50121 Florence, Italy

<sup>3</sup> Polytechnique Montréal—Génie Chimique 2900 Boul, Edouard Montpetit—H3T 1J4, Montréal, QC H3C 3A7, Canada; daria-camilla.boffito@polymtl.ca

<sup>4</sup> Department of Chemistry, Università degli Studi di Torino, via Pietro Giuria, 7, 10125 Torino, Italy; giuseppina.cerrato@unito.it (G.C.); alessia.giordana@unito.it (A.G.)

\* Correspondence: ermelinda.falletta@unimi.it; Tel.: +39-025-031-4410

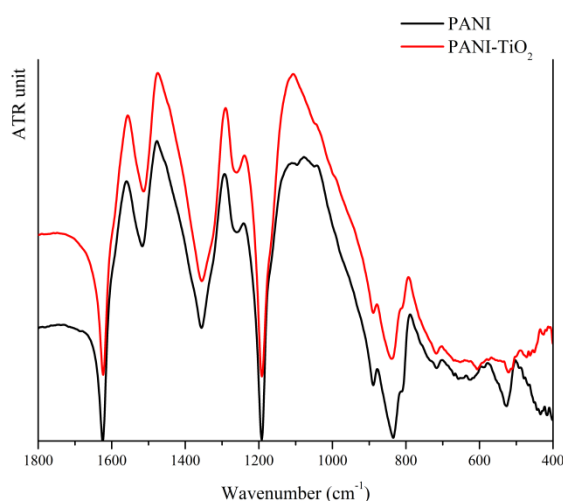

**Figure S1.** ATR-FTIR spectra of PANI and PANI/TiO<sub>2</sub>.

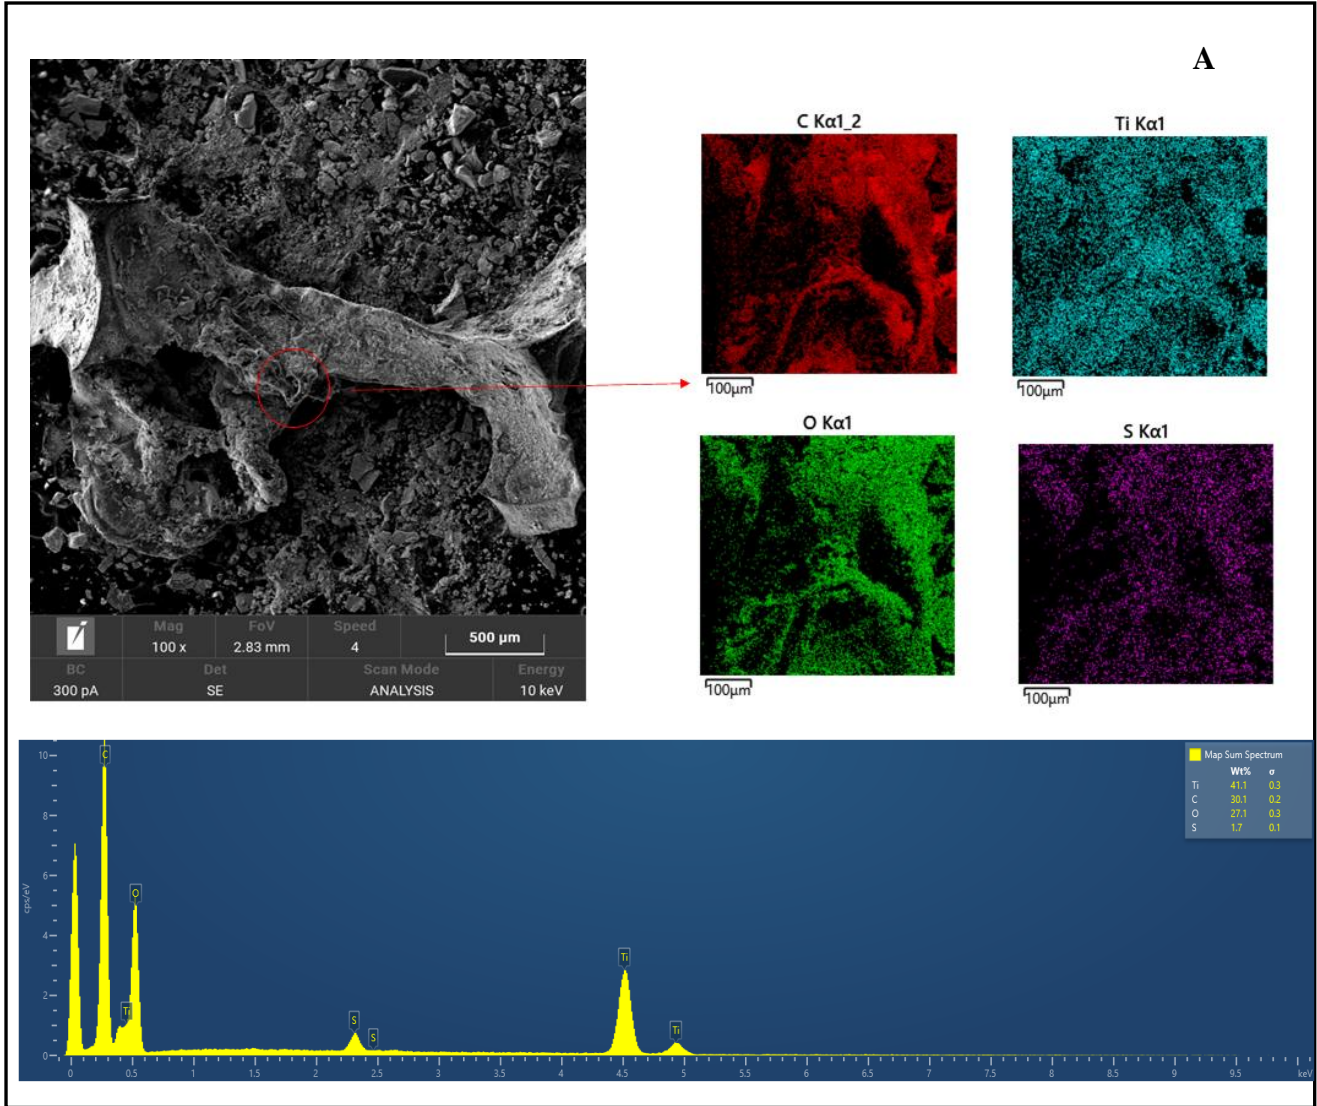

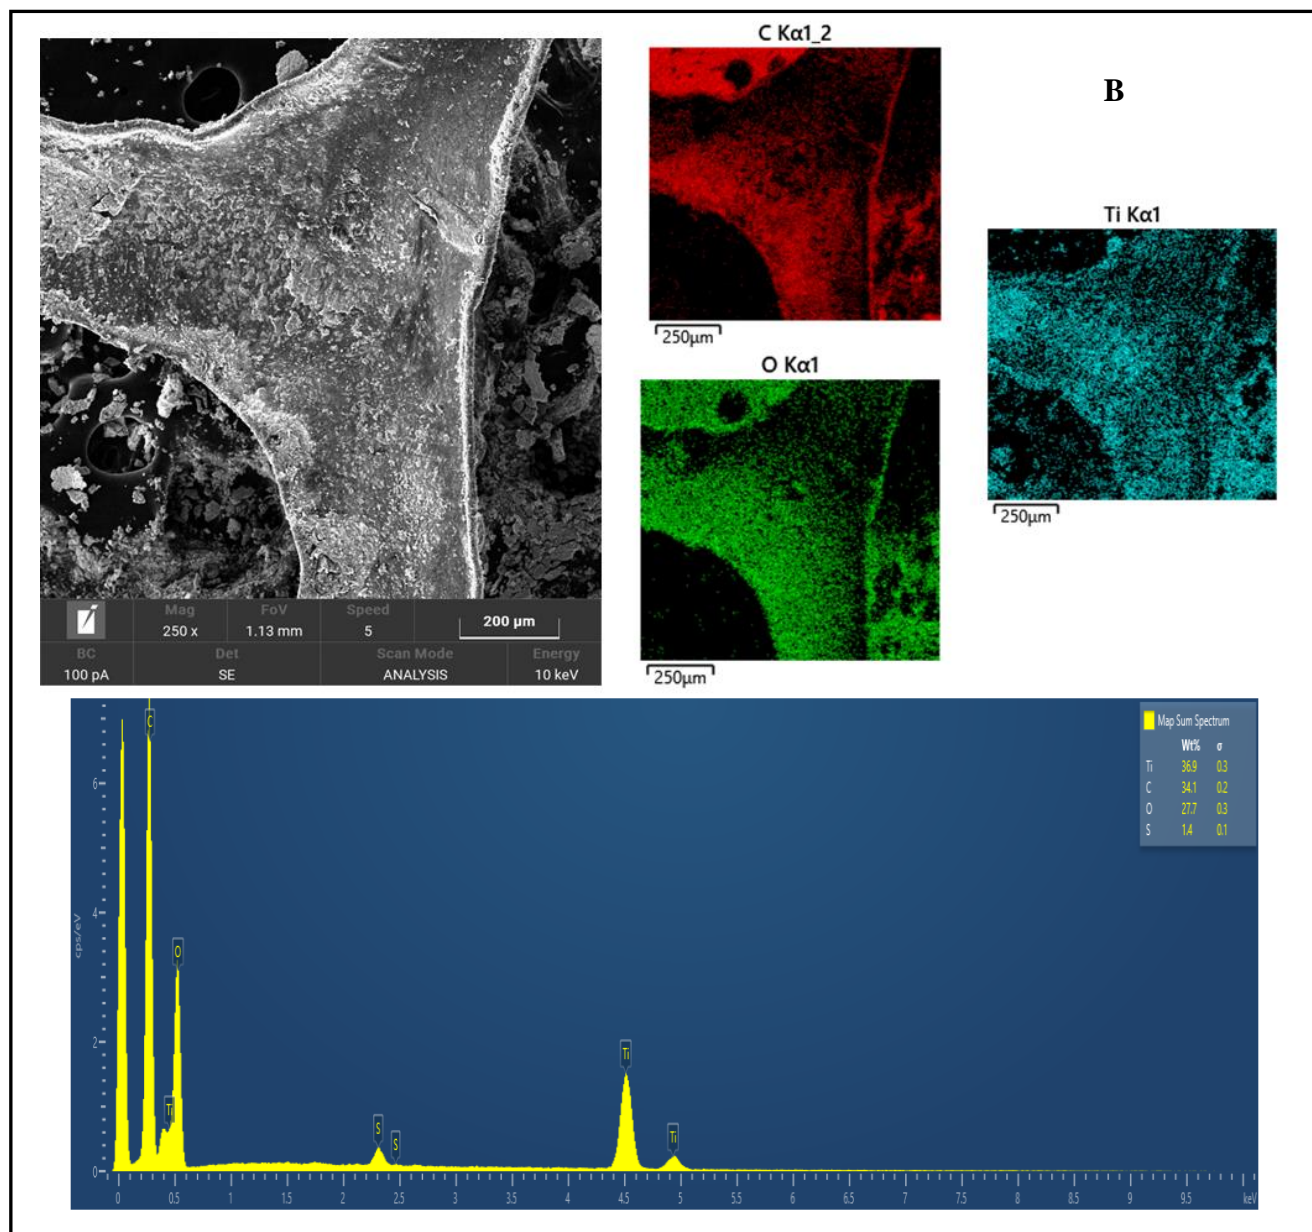

**Figure S2.** FESEM images and EDS analyses of (A) PT/PU-4 and (B) PT/PU-6.

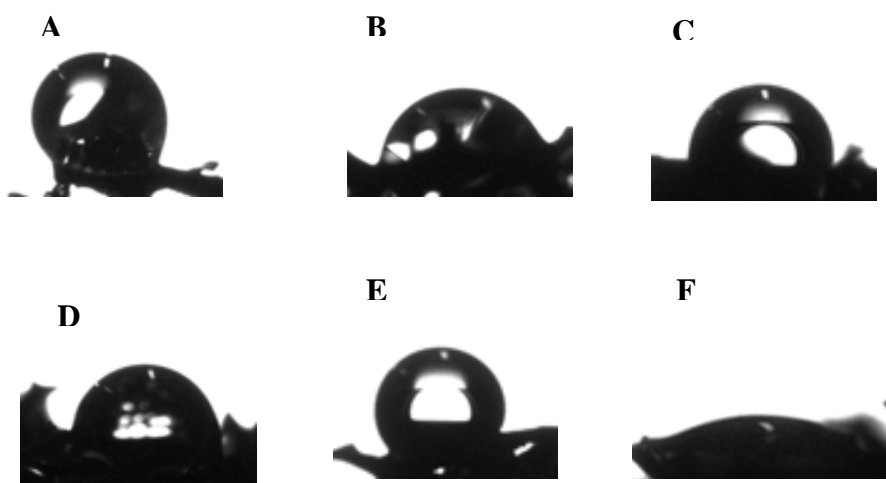

**Figure S3.** Contact angle images for droplets water on: (A) P/PU, (B) PT/PU-1, (C) PT/PU-2, (D) PT/PU-3, (E) PT/PU-4, (F) PT/PU-5.

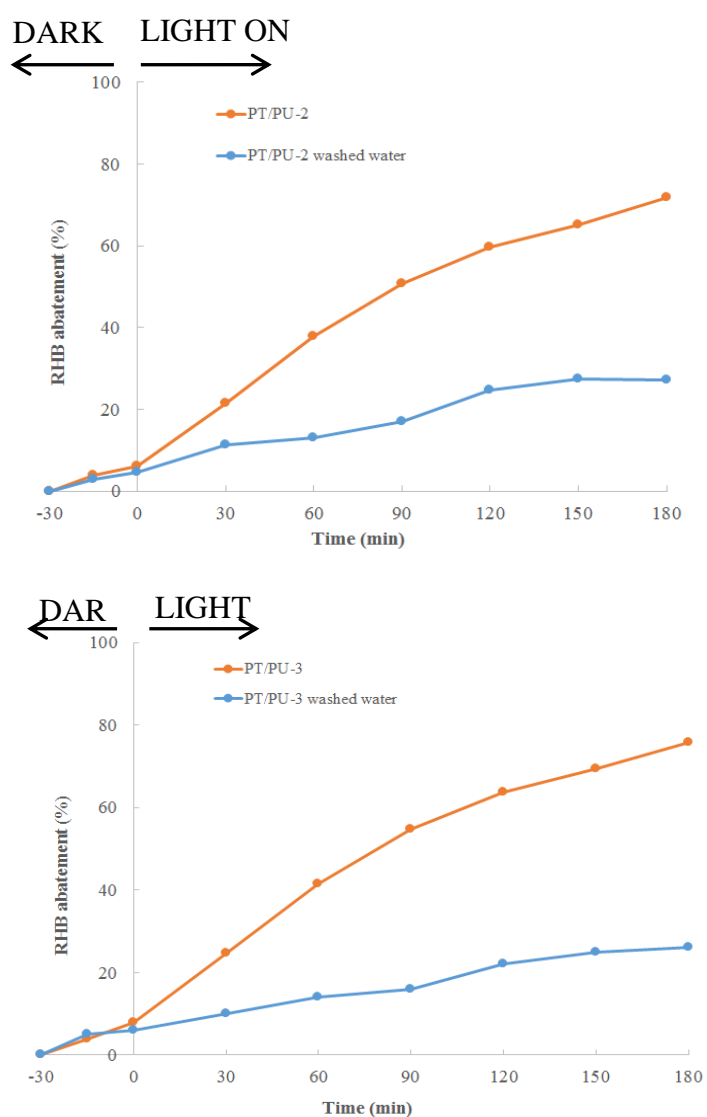

**Figure S4.** Reuse of PT/PU-2 (up) and PT/PU-3 (down) for RHB abatement after washing with water
